# Supplementary material
Source: PubMed Central journal article supplement (PMC3814729)
Supplement: supp_blood-2013-07-511170_blood-2013-07-511170-1.pdf [file supp_blood-2013-07-511170_blood-2013-07-511170-1.pdf]

## Supplementary Data

**Table. Study drug dosing in the MPD cohort (n = 52) and the overall study population (N = 84)**

|                                                  | Carfilzomib       |                 | Lenalidomide    |                 | Dexamethasone |              |
|--------------------------------------------------|-------------------|-----------------|-----------------|-----------------|---------------|--------------|
|                                                  | MPD               | Overall         | MPD             | Overall         | MPD           | Overall      |
| Cycles started, median (range)                   | 9.5 (1–45)        | 8.5 (1–55)      | 8.5 (1–44)      | 7.0 (1–50)      | 9.0 (1–44)    | 7.0 (1–50)   |
| Number of doses, median (range)                  | 51.5 (2–246)      | 46.0 (2–254)    | 152.0 (2–885)   | 134.5 (2–1049)  | 28.0 (1–156)  | 20.0 (1–156) |
| Dose reduction due to AE, n (%)                  | 4 (7.7)           | 4 (4.8)         | --              | --              | --            | --           |
| Dose reduction for any reason, n (%)             | --                | --              | 18 (34.6)       | 25 (29.8)       | 22 (42.3)     | 28 (33.3)    |
| Dose interruption, n (%)                         | 2 (3.8)           | 2 (2.4)         | --              | --              | --            | --           |
| Dose delay, n (%)                                | 36 (69.2)         | 55 (65.5)       | --              | --              | --            | --           |
| Dose missed, n (%)                               | 34 (65.4)         | 54(64.3)        | 39 (75.0)       | 59 (70.2)       | 33 (63.5)     | 59 (70.2)    |
| Average dose per administration, median (range)* | 26.7 (17–27)      | 24.8 (15–27)    | 25.0 (11–25)    | 24.0 (10–25)    | 40 (4–40)     | 40 (4–40)    |
| Cumulative dose across cycles, median (range)*   | 1322.5 (40– 6628) | 944.5 (30–6628) | 3120 (50–22125) | 2825 (50–22125) | 840 (4–6240)  | 730 (4–6240) |

\*mg/m<sup>2</sup> for carfilzomib and mg for dexamethasone and lenalidomide.
